# Supplementary material
Source: Springer Nature journal article supplement (https://www.springermedizin.de/resource/supplementary/12950_2011_233_MOESM1_ESM.pdf/9558262)

### Syndecan - 1

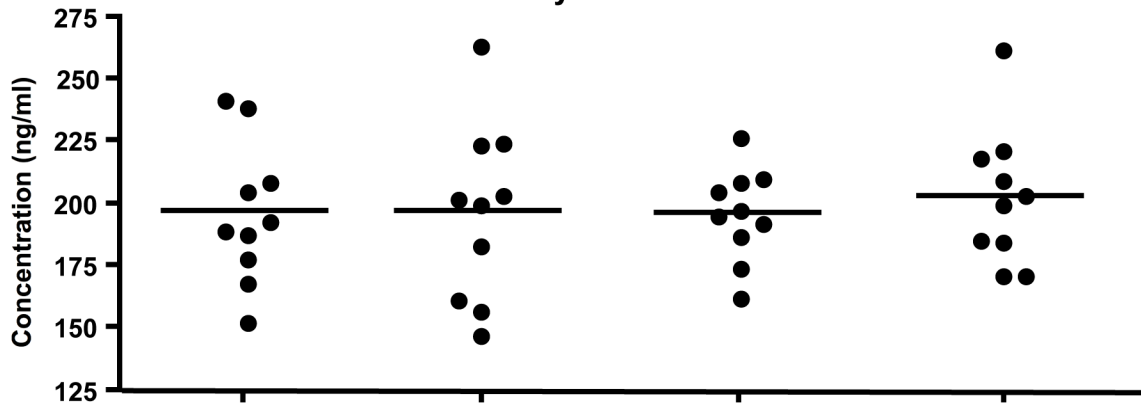

### Heparan sulfate

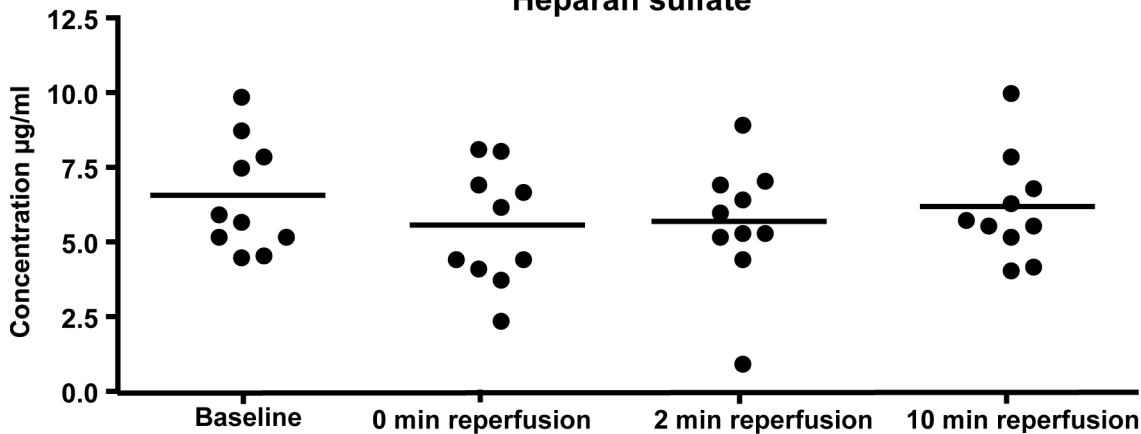

Supplement: MOESM1 [file 9558262]
